# Supplementary material for: Predictive Models of within- and between-Species SARS-CoV-2 Transmissibility
Source: MDPI journal article supplement (doi:10.3390/v14071565), 2022-07-19
Supplement: s1 [file s1]

**Table S1** – List of candidate species susceptible to SARS-CoV-2 infection obtained using the large scale predictive model. Damas score represents the results obtained by Damas et al. (2020). Species without this score were absent in their sample.

| Class    | Order        | Family           | Species                               | Damas Score |
|----------|--------------|------------------|---------------------------------------|-------------|
| Mammalia | Artiodactyla | Camelidae        | <i>Camelus bactrianus</i>             | Low         |
| Mammalia | Artiodactyla | Camelidae        | <i>Camelus dromedarius</i>            | Low         |
| Mammalia | Artiodactyla | Camelidae        | <i>Vicugna pacos</i>                  | Medium      |
| Mammalia | Artiodactyla | Bovidae          | <i>Bos indicus x Bos taurus</i>       | Medium      |
| Mammalia | Artiodactyla | Bovidae          | <i>Bos mutus</i>                      | Medium      |
| Mammalia | Artiodactyla | Bovidae          | <i>Bos taurus</i>                     | Medium      |
| Mammalia | Artiodactyla | Bovidae          | <i>Bubalus bubalis</i>                | Medium      |
| Mammalia | Artiodactyla | Bovidae          | <i>Capra hircus</i>                   | Medium      |
| Mammalia | Artiodactyla | Bovidae          | <i>Ovis aries</i>                     | Medium      |
| Mammalia | Artiodactyla | Suidae           | <i>Sus scrofa</i>                     | Low         |
| Mammalia | Carnivora    | Felidae          | <i>Acinonyx jubatus</i>               | Medium      |
| Mammalia | Carnivora    | Felidae          | <i>Felis catus</i>                    | Medium      |
| Mammalia | Carnivora    | Felidae          | <i>Lynx canadensis</i>                | Medium      |
| Mammalia | Carnivora    | Felidae          | <i>Panthera pardus</i>                | Medium      |
| Mammalia | Carnivora    | Felidae          | <i>Puma concolor</i>                  | Medium      |
| Mammalia | Carnivora    | Felidae          | <i>Panthera leo</i>                   | -           |
| Mammalia | Carnivora    | Canidae          | <i>Canis lupus dingo</i>              | Low         |
| Mammalia | Carnivora    | Canidae          | <i>Vulpes vulpes</i>                  | Low         |
| Mammalia | Carnivora    | Mustelidae       | <i>Enhydra lutris kenyon</i>          | Very low    |
| Mammalia | Carnivora    | Mustelidae       | <i>Lontra canadensis</i>              | -           |
| Mammalia | Carnivora    | Mustelidae       | <i>Mustela erminea</i>                | Very low    |
| Mammalia | Carnivora    | Mustelidae       | <i>Mustela putorius furo</i>          | Very low    |
| Mammalia | Carnivora    | Mustelidae       | <i>Neovison vison</i>                 | Very low    |
| Mammalia | Carnivora    | Otariidae        | <i>Callorhinus ursinus</i>            | Very low    |
| Mammalia | Carnivora    | Otariidae        | <i>Eumetopias jubatus</i>             | Very low    |
| Mammalia | Carnivora    | Otariidae        | <i>Zalophus californianus</i>         | Very low    |
| Mammalia | Carnivora    | Phocidae         | <i>Mirounga leonina</i>               | -           |
| Mammalia | Carnivora    | Phocidae         | <i>Neomonachus schauinslandi</i>      | Very low    |
| Mammalia | Carnivora    | Odobenidae       | <i>Odobenus rosmarus divergens</i>    | Very low    |
| Mammalia | Carnivora    | Phocidae         | <i>Phoca vitulina</i>                 | Very low    |
| Mammalia | Carnivora    | Ursidae          | <i>Ursus arctos horribilis</i>        | Low         |
| Mammalia | Cetacea      | Balaenopteridae  | <i>Balaenoptera a. scammoni</i>       | High        |
| Mammalia | Cetacea      | Monodontidae     | <i>Delphinapterus leucas</i>          | High        |
| Mammalia | Cetacea      | Delphinidae      | <i>Globicephala melas</i>             | High        |
| Mammalia | Cetacea      | Delphinidae      | <i>Lagenorhynchus obliquidens</i>     | High        |
| Mammalia | Cetacea      | Lipotidae        | <i>Lipotes vexillifer</i>             | High        |
| Mammalia | Cetacea      | Monodontidae     | <i>Monodon monoceros</i>              | High        |
| Mammalia | Cetacea      | Phocoenidae      | <i>Neophocaena a. asiaeorientalis</i> | High        |
| Mammalia | Cetacea      | Delphinidae      | <i>Orcinus orca</i>                   | High        |
| Mammalia | Cetacea      | Phocoenidae      | <i>Phocoena sinus</i>                 | -           |
| Mammalia | Cetacea      | Physeteridae     | <i>Physeter catodon</i>               | Medium      |
| Mammalia | Cetacea      | Delphinidae      | <i>Tursiops truncatus</i>             | High        |
| Mammalia | Chiroptera   | Vespertilionidae | <i>Eptesicus fuscus</i>               | Very low    |
| Mammalia | Chiroptera   | Phyllostomidae   | <i>Phyllostomus discolor</i>          | Very low    |
| Mammalia | Chiroptera   | Pteropodidae     | <i>Pteropus alecto</i>                | Low         |
| Mammalia | Chiroptera   | Pteropodidae     | <i>Pteropus vampyrus</i>              | Low         |

|          |                |                 |                                        |           |
|----------|----------------|-----------------|----------------------------------------|-----------|
| Mammalia | Chiroptera     | Pteropodidae    | <i>Rousettus aegyptiacus</i>           | Low       |
| Mammalia | Diprotodontia  | Phascolarctidae | <i>Phascolarctos cinereus</i>          | Very low  |
| Mammalia | Diprotodontia  | Vombatidae      | <i>Vombatus ursinus</i>                | Very low  |
| Mammalia | Lagomorpha     | Leporidae       | <i>Oryctolagus cuniculus</i>           | Medium    |
| Mammalia | Lagomorpha     | Ochotonidae     | <i>Ochotona princeps</i>               | Low       |
| Mammalia | Perissodactyla | Equidae         | <i>Equus asinus</i>                    | Low       |
| Mammalia | Perissodactyla | Equidae         | <i>Equus caballus</i>                  | Low       |
| Mammalia | Perissodactyla | Equidae         | <i>Equus przewalskii</i>               | Low       |
| Mammalia | Perissodactyla | Rhinocerotidae  | <i>Ceratotherium simum simum</i>       | Low       |
| Mammalia | Pholidota      | Manidae         | <i>Manis javanica</i>                  | Very low  |
| Mammalia | Primates       | Aotidae         | <i>Aotus nancymae</i>                  | Medium    |
| Mammalia | Primates       | Cercopithecidae | <i>Cercocebus atys</i>                 | Very high |
| Mammalia | Primates       | Cercopithecidae | <i>Chlorocebus sabaeus</i>             | Very high |
| Mammalia | Primates       | Hominidae       | <i>Gorilla gorilla gorilla</i>         | Very high |
| Mammalia | Primates       | Hominidae       | <i>Homo sapiens</i>                    | Very high |
| Mammalia | Primates       | Cercopithecidae | <i>Macaca fascicularis</i>             | Very high |
| Mammalia | Primates       | Cercopithecidae | <i>Macaca mulatta</i>                  | Very high |
| Mammalia | Primates       | Cercopithecidae | <i>Macaca nemestrina</i>               | Very high |
| Mammalia | Primates       | Cercopithecidae | <i>Mandrillus leucophaeus</i>          | Very high |
| Mammalia | Primates       | Cheirogaleidae  | <i>Microcebus murinus</i>              | Low       |
| Mammalia | Primates       | Hylobatidae     | <i>Nomascus leucogenys</i>             | Very high |
| Mammalia | Primates       | Hominidae       | <i>Pan paniscus</i>                    | Very high |
| Mammalia | Primates       | Hominidae       | <i>Pan troglodytes</i>                 | Very high |
| Mammalia | Primates       | Cercopithecidae | <i>Papio anubis</i>                    | Very high |
| Mammalia | Primates       | Cercopithecidae | <i>Ptilocolobus tephrosceles</i>       | Very high |
| Mammalia | Primates       | Cercopithecidae | <i>Rhinopithecus roxellana</i>         | Very high |
| Mammalia | Primates       | Cebidae         | <i>Saimiri boliviensis boliviensis</i> | Medium    |
| Mammalia | Primates       | Cebidae         | <i>Sapajus apella</i>                  | Medium    |
| Mammalia | Primates       | Cercopithecidae | <i>Theropithecus gelada</i>            | Very high |
| Mammalia | Primates       | Cercopithecidae | <i>Trachypithecus francoisi</i>        | -         |
| Mammalia | Primates       | Hylobatidae     | <i>Hylobates moloch</i>                | -         |
| Mammalia | Primates       | Cebidae         | <i>Callithrix jacchus</i>              | Medium    |
| Mammalia | Primates       | Hominidae       | <i>Pongo abelii</i>                    | Very high |
| Mammalia | Primates       | Galagidae       | <i>Otolemur garnettii</i>              | Very low  |
| Mammalia | Primates       | Indriidae       | <i>Propithecus coquereli</i>           | High      |
| Mammalia | Proboscidea    | Elephantidae    | <i>Loxodonta africana</i>              | Low       |
| Mammalia | Rodentia       | Cricetidae      | <i>Peromyscus leucopus</i>             | Low       |
| Mammalia | Rodentia       | Cricetidae      | <i>Peromyscus maniculatus bairdii</i>  | Medium    |
| Mammalia | Rodentia       | Cricetidae      | <i>Cricetulus griseus</i>              | High      |
| Mammalia | Rodentia       | Cricetidae      | <i>Mesocricetus auratus</i>            | Medium    |
| Mammalia | Rodentia       | Cricetidae      | <i>Microtus ochrogaster</i>            | Low       |
| Mammalia | Rodentia       | Muridae         | <i>Mastomys coucha</i>                 | Very low  |
| Mammalia | Rodentia       | Muridae         | <i>Mus caroli</i>                      | Very low  |
| Mammalia | Rodentia       | Muridae         | <i>Mus pahari</i>                      | Very low  |
| Mammalia | Rodentia       | Muridae         | <i>Rattus rattus</i>                   | -         |
| Mammalia | Rodentia       | Muridae         | <i>Mus musculus</i>                    | Very low  |
| Mammalia | Rodentia       | Muridae         | <i>Grammomys surdaster</i>             | Very low  |
| Mammalia | Rodentia       | Spalacidae      | <i>Nannospalax galili</i>              | High      |
| Mammalia | Rodentia       | Sciuridae       | <i>Marmota flaviventris</i>            | Medium    |
| Mammalia | Rodentia       | Dipodidae       | <i>Jaculus jaculus</i>                 | Very low  |
| Mammalia | Rodentia       | Bathyergidae    | <i>Heterocephalus glaber</i>           | Medium    |

|          |               |               |                                       |          |
|----------|---------------|---------------|---------------------------------------|----------|
| Mammalia | Rodentia      | Sciuridae     | <i>Ictidomys tridecemlineatus</i>     | Medium   |
| Mammalia | Rodentia      | Sciuridae     | <i>Urocitellus parryi</i>             | Medium   |
| Mammalia | Rodentia      | Heteromyidae  | <i>Dipodomys ordii</i>                | Medium   |
| Mammalia | Scandentia    | Tupaiaidae    | <i>Tupaia chinensis</i>               | Very low |
| Mammalia | Sirenia       | Trichechidae  | <i>Trichechus manatus latirostris</i> | Low      |
| Aves     | Passeriformes | Thraupidae    | <i>Camarhynchus parvulus</i>          | Very low |
| Aves     | Passeriformes | Paridae       | <i>Cyanistes caeruleus</i>            | Very low |
| Aves     | Passeriformes | Muscicapidae  | <i>Ficedula albicollis</i>            | Very low |
| Aves     | Passeriformes | Fringillidae  | <i>Serinus canaria</i>                | Very low |
| Aves     | Passeriformes | Sturnidae     | <i>Sturnus vulgaris</i>               | Very low |
| Aves     | Passeriformes | Passerellidae | <i>Zonotrichia albicollis</i>         | Very low |
| Reptilia | Squamata      | Lacertidae    | <i>Zootoca vivipara</i>               | Very low |

---
